# Supplementary material for: Locally regulating Li+ distribution on an electrode surface with Li–Sn alloying nanoparticles for stable lithium metal anodes
Source: Royal Society of Chemistry journal article supplement (doi:10.1039/d3dt00260h), 2023-01-01
Supplement: d3dt00260h1.pdf [file d3dt00260h1.pdf]

## Supporting information

### Locally regulating Li<sup>+</sup> distribution on electrode surface with Li-Sn alloying nanoparticles for stable lithium metal anodes

Jianzong Man <sup>\*a</sup>, Wenlong Liu <sup>b</sup>, Xiaodong Sun <sup>b</sup>, Juncai Sun <sup>\*b</sup>

<sup>a</sup> Shandong Provincial Key Laboratory of Chemical Energy Storage and New Battery Technology, Liaocheng University, Liaocheng, 252000, China

<sup>b</sup> Institute of Materials and Technology, Dalian Maritime University, Dalian, 116026, China

\* Corresponding author:

[manjianzong@lcu.edu.cn](mailto:manjianzong@lcu.edu.cn) (J. Man); [sunjc@dmlu.edu.cn](mailto:sunjc@dmlu.edu.cn) (J. Sun)

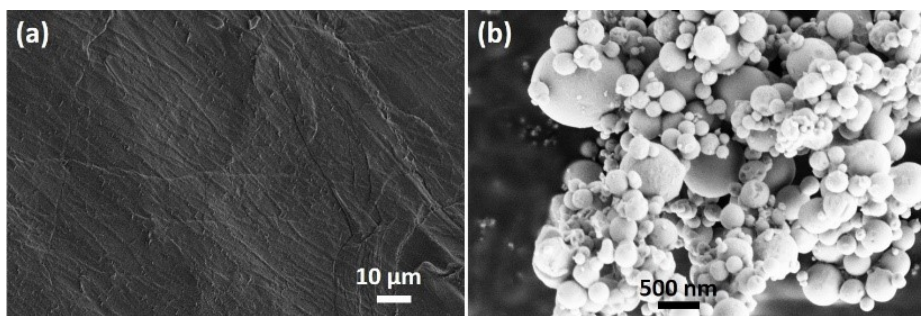

Fig. S1 The SEM images of (a) bare Li and (b) Sn powders.

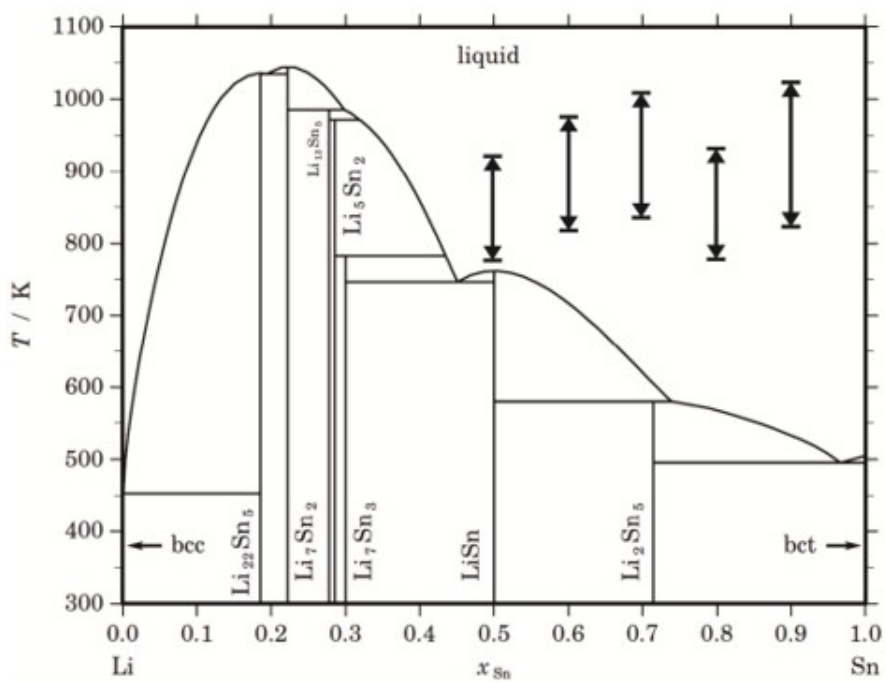

Fig. S2 The binary phase diagram of Li-Sn.

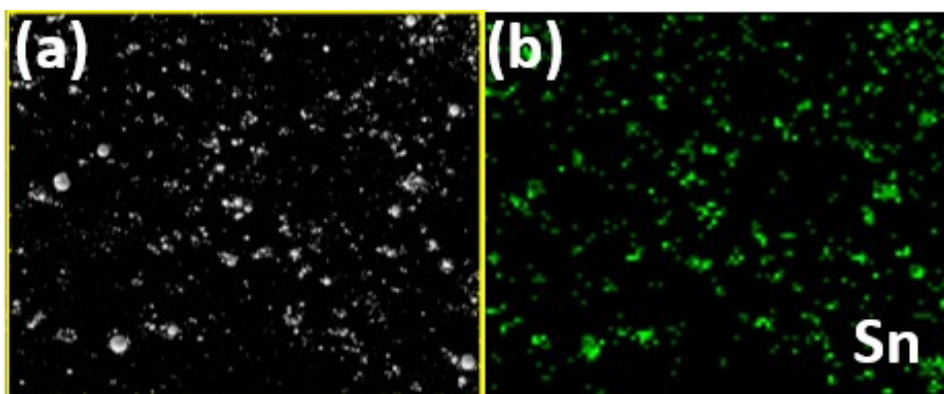

Fig. S3 The elemental distribution of Sn on the surface of Li-Sn anode.

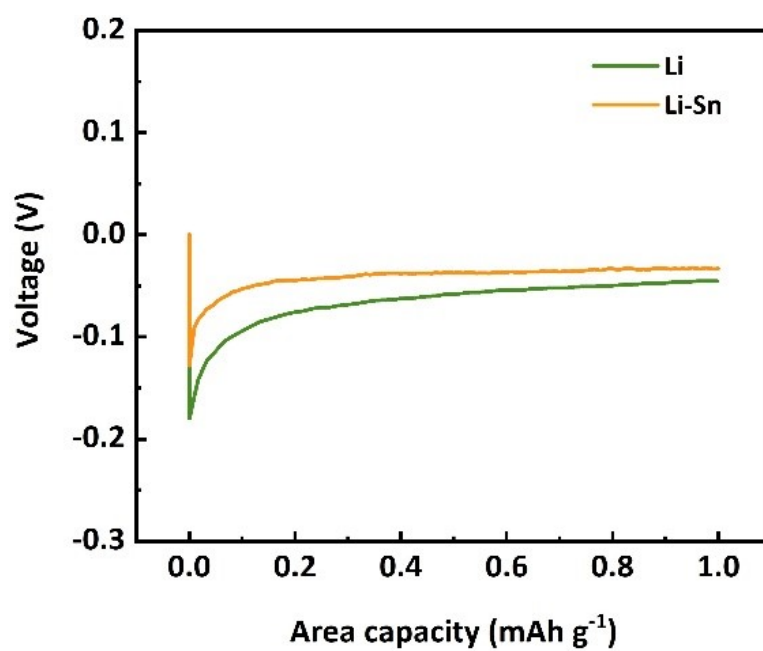

Fig. S4 Comparison of Li nucleation overpotential on the bare Li and Li-Sn anode.

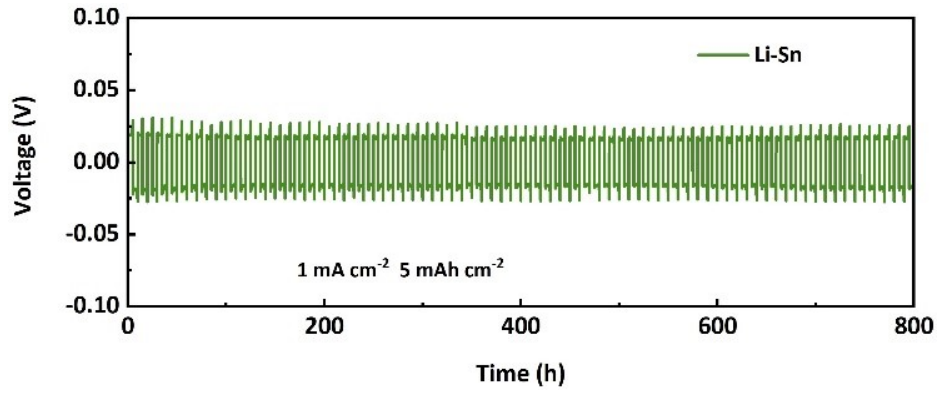

Fig. S5 The cycling performance of Li-Sn symmetrical cell with the plating/stripping capacity of 5 mAh cm<sup>-2</sup> at the current density of 1 mA cm<sup>-2</sup>.

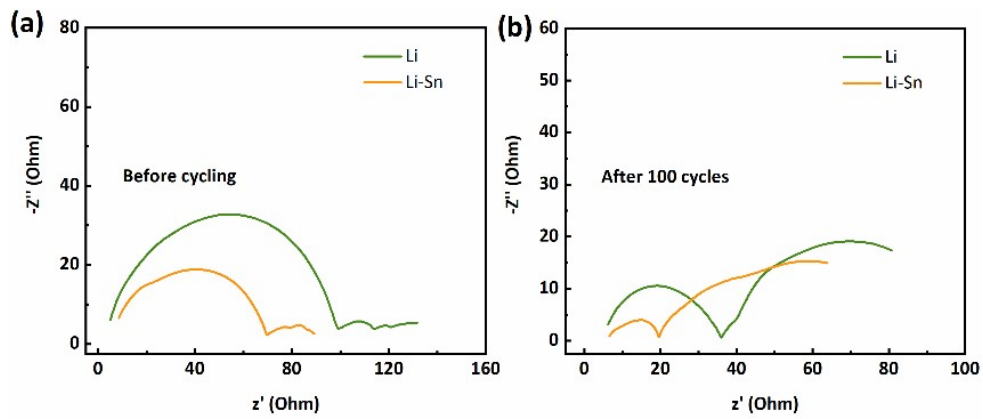

Fig. S6 Comparison of impedance of bare Li and Li-Sn symmetrical cells before cycling and after 100 cycles.

Table S1 Comparison of electrochemical performance of similar configuration of anode.

| Li-M alloy anode           | Modification method                                  | Current density-capacity (mA cm <sup>-2</sup> -mAh cm <sup>-2</sup> ) | Hysteresis voltage (mV) | Cycling time (h) | Reference |
|----------------------------|------------------------------------------------------|-----------------------------------------------------------------------|-------------------------|------------------|-----------|
| Li@NFZO                    | Li melting infusion                                  | 1-1                                                                   | 57                      | 700              | [1]       |
| Li-LiAl                    | Li-Al thermal melting                                | 1-1                                                                   | 15                      | 1100             | [2]       |
| Li@Li-Zn                   | Depositing Zn on Cu foam- electrochemical deposition | 1-1                                                                   | 23                      | 400              | [3]       |
| Li@CuSn                    | Electroless Sn plating- electrochemical deposition   | 1-1                                                                   | ~20                     | 800              | [4]       |
| CP/Sn/SnO <sub>2</sub> @Li | Heat treatment (SnO <sub>2</sub> , Li)               | 1-1                                                                   | ~25                     | 800              | [5]       |
| Li-Mg alloy                | Melting-spontaneous reaction                         | 1-1                                                                   | 23                      | 1000             | [6]       |
| Sn-Li scaffold             | Electrodeposition                                    | 1-1                                                                   | 21.3                    | 750              | [7]       |
| Li-Sn                      | Rolling                                              | 1-1<br>1-5                                                            | 10<br>20                | 1200<br>800      | This work |

Table S2 Simulation parameters of impedance for bare Li and Li-Sn symmetrical cells before and after cycling.

| Electrode | Before cycling       |                     | After 100 cycles     |                     |
|-----------|----------------------|---------------------|----------------------|---------------------|
|           | R <sub>SEI</sub> (Ω) | R <sub>ct</sub> (Ω) | R <sub>SEI</sub> (Ω) | R <sub>ct</sub> (Ω) |
| Li        | 93.4                 | 14.2                | 30.5                 | 68.1                |
| Li-Sn     | 60.7                 | 9.3                 | 13.2                 | 59.6                |

## References:

- [1] J. Jia, Z. Tang, Z. Guo, H. Xu, H. Hu, S. Li, 3D composite lithium metal anode with pre-fabricated LiZn via reactive wetting, *Chem. Commun.*, 56 (2020) 4248-4251.
- [2] H. Zhuang, P. Zhao, G. Li, Y. Xu, X. Jia, Li-LiAl alloy composite with memory effect as high-performance lithium metal anode, *J. Power Sources*, 455 (2020) 227977.
- [3] Y. Ye, Y. Liu, J. Wu, Y. Yang, Lithiophilic Li-Zn alloy modified 3D Cu foam for dendrite-free lithium metal anode, *J. Power Sources*, 472 (2020) 228520.
- [4] Z. Luo, C. Liu, Y. Tian, Y. Zhang, Y. Jiang, J. Hu, H. Hou, G. Zou, X. Ji, Dendrite-free lithium metal anode with lithiophilic interphase from hierarchical frameworks by tuned nucleation, *Energy Storage Materials*, 27 (2020) 124-132.
- [5] L. Tan, S. Feng, X. Li, Z. Wang, W. Peng, T. Liu, G. Yan, L. Li, F. Wu, J. Wang, Oxygen-induced lithiophilicity of tin-based framework toward highly stable lithium metal anode, *Chem. Eng. J.*, 394 (2020) 124848.
- [6] K. Peng, Z. Chen, X. Zhao, K. Shi, C. Zhu, X. Yan, Dual-Conductive Li alloy composite anode constructed by a synergetic Conversion-Alloying reaction with LiMgPO<sub>4</sub>, *Chem. Eng. J.*, 439 (2022) 135705.
- [7] L. Ren, X. Cao, Y. Wang, M. Zhou, W. Liu, H. Xu, H. Zhou, X. Sun, 3D porous and li-rich sn-li alloy scaffold with mixed Ionic-Electronic conductivity for Dendrite-Free lithium metal anodes, *J. Alloy Compd.*, (2023) 169362.
